# Supplementary material for: Visualization of custom-tailored iron oxide nanoparticles chemistry, uptake, and toxicity
Source: Royal Society of Chemistry journal article supplement (doi:10.1039/c2nr32572a), 2012-01-01
Supplement: c2nr32572a.pdf [file c2nr32572a.pdf]

# Visualization of Custom-tailored Iron Oxide

## Nanoparticles Chemistry, Uptake, and Toxicity

### (Supplementary Information)

#### FIGURES

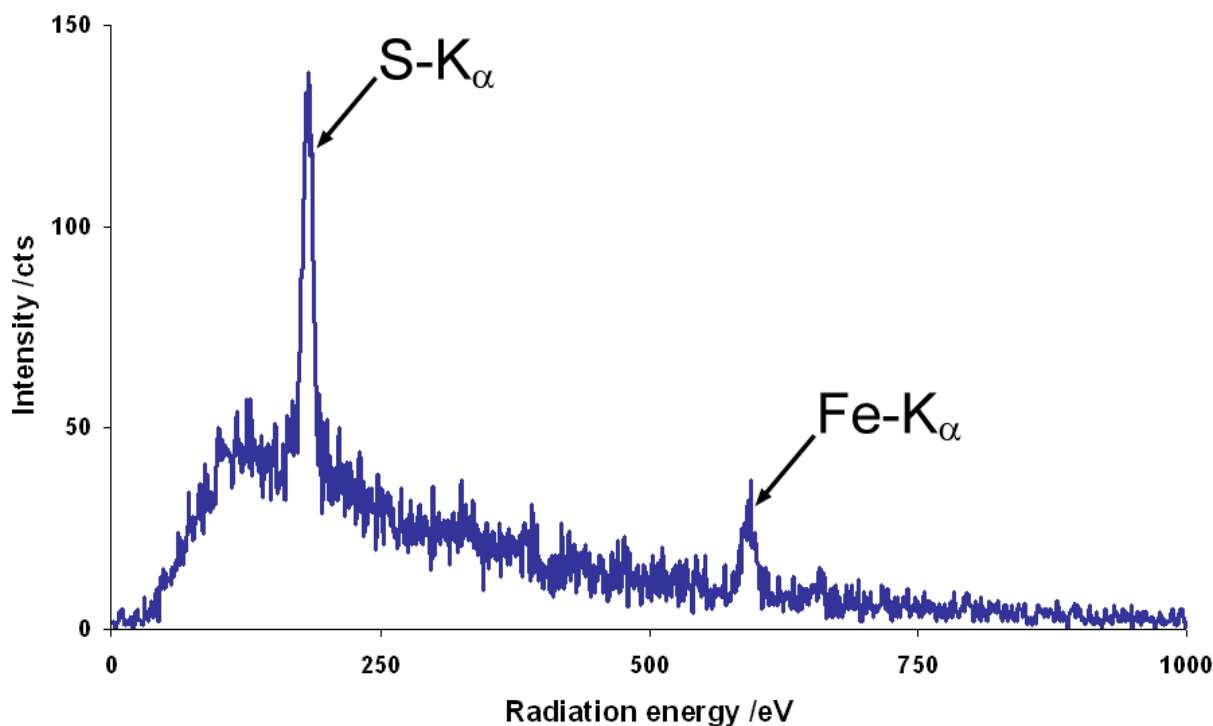

**Figure S1.** SEM-EDS area spectrum of a dry sample of prepared iron oxide NPs with notated energy lines for peaks. The sulfur is a residue of dried DMSO.

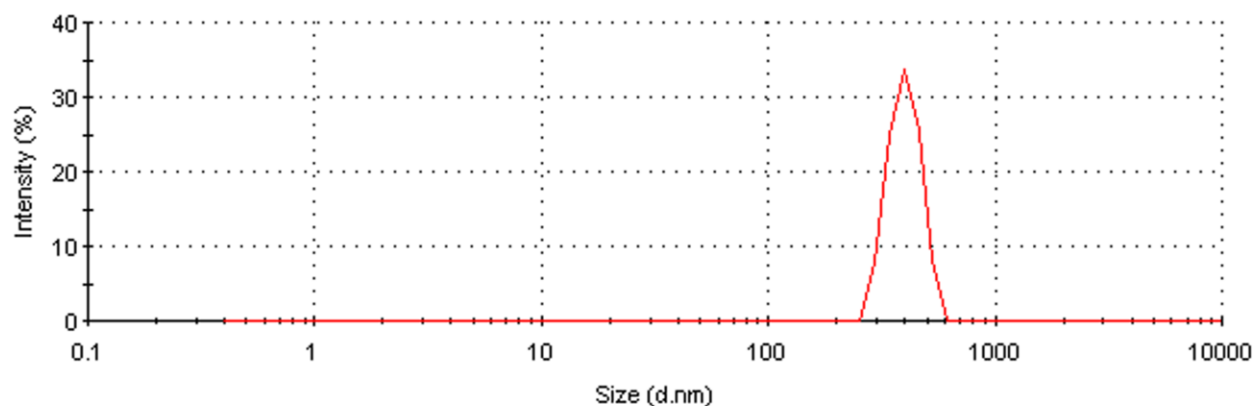

|                                | Diam. (nm)           | % Intensity | Width (nm) |
|--------------------------------|----------------------|-------------|------------|
| <b>Z-Average (d.nm):</b> 431,5 | <b>Peak 1:</b> 402,1 | 100,0       | 63,26      |
| <b>Pdl:</b> 0,190              | <b>Peak 2:</b> 0,000 | 0,0         | 0,000      |
| <b>Intercept:</b> 0,904        | <b>Peak 3:</b> 0,000 | 0,0         | 0,000      |
| <b>Result quality :</b> Good   |                      |             |            |

**Figure S2.** DLS measurement of the iron oxide NPs in ethanol and accompanying data.

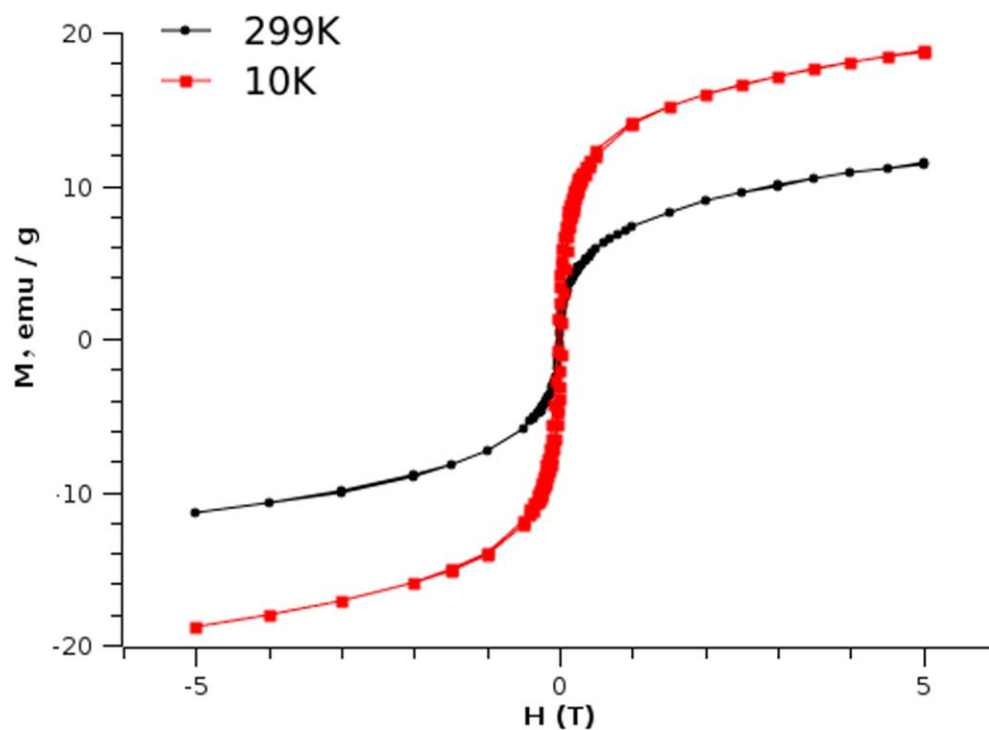

**Figure S3.** Temperature dependence of the magnetic properties of the prepared iron oxide NPs.
